# Supplementary material for: First Molecular Evidence of Pathogens in Fleas Collected from Dogs in Northern Vietnam
Source: MDPI journal article supplement (doi:10.3390/pathogens10091185), 2021-09-14
Supplement: s1 [file s1]

**Table S1.** Part of pairwise distance matrix based on nucleotide sequences of *Candidatus Mycoplasma haemobos* and *Mycoplasma wenyonii* strains.

| No. |                                                                 | 1     | 2     | 3     | 4     | 5     | 6     | 7     | 8     | 9     | 10    | 11    | 12    | 13    | 14    | 15    | 16    | 17 |
|-----|-----------------------------------------------------------------|-------|-------|-------|-------|-------|-------|-------|-------|-------|-------|-------|-------|-------|-------|-------|-------|----|
| 1   | <i>Ca. M. haemobos</i> BGD29 (This study)                       |       |       |       |       |       |       |       |       |       |       |       |       |       |       |       |       |    |
| 2   | <i>Ca. M. haemobos</i> BGD49 (This study)                       | 0.000 |       |       |       |       |       |       |       |       |       |       |       |       |       |       |       |    |
| 3   | MT341495 <i>Ca. M. haemobos</i> Cattle blood (Brazil)           | 0.002 | 0.002 |       |       |       |       |       |       |       |       |       |       |       |       |       |       |    |
| 4   | KT985638 <i>Ca. M. haemobos</i> Cattle blood (Malaysia)         | 0.002 | 0.002 | 0.000 |       |       |       |       |       |       |       |       |       |       |       |       |       |    |
| 5   | MG948631 <i>Ca. M. haemobos</i> Cattle blood (Cuba)             | 0.002 | 0.002 | 0.000 | 0.000 |       |       |       |       |       |       |       |       |       |       |       |       |    |
| 6   | KJ883514 <i>Ca. M. haemobos</i> Dog blood (Taiwan)              | 0.002 | 0.002 | 0.000 | 0.000 | 0.000 |       |       |       |       |       |       |       |       |       |       |       |    |
| 7   | EF616468 <i>Ca. M. haemobos</i> Cattle Blood (Switzerland)      | 0.002 | 0.002 | 0.000 | 0.000 | 0.000 | 0.000 |       |       |       |       |       |       |       |       |       |       |    |
| 8   | MH388480 <i>Ca. M. haemobos Rhipicephalus microplus</i> (China) | 0.004 | 0.004 | 0.002 | 0.002 | 0.002 | 0.002 | 0.002 |       |       |       |       |       |       |       |       |       |    |
| 9   | MW463060 <i>Ca. M. haemobos</i> Dog blood (China)               | 0.004 | 0.004 | 0.002 | 0.002 | 0.002 | 0.002 | 0.002 | 0.000 |       |       |       |       |       |       |       |       |    |
| 10  | EU367965 <i>Ca. M. haemobos</i> Cattle blood (Japan)            | 0.004 | 0.004 | 0.002 | 0.002 | 0.002 | 0.002 | 0.002 | 0.004 | 0.004 |       |       |       |       |       |       |       |    |
| 11  | <i>M. Wenyonii</i> HND16 (This study)                           | 1.399 | 1.399 | 1.397 | 1.397 | 1.397 | 1.397 | 1.397 | 1.394 | 1.394 | 1.399 |       |       |       |       |       |       |    |
| 12  | <i>M. Wenyonii</i> BVD39 (This study)                           | 1.399 | 1.399 | 1.397 | 1.397 | 1.397 | 1.397 | 1.397 | 1.394 | 1.394 | 1.399 | 0.004 |       |       |       |       |       |    |
| 13  | MT241311 <i>M. wenyonii</i> Buffalo blood (Philippines)         | 1.373 | 1.373 | 1.370 | 1.370 | 1.370 | 1.370 | 1.370 | 1.368 | 1.368 | 1.373 | 0.004 | 0.004 |       |       |       |       |    |
| 14  | FN392885 <i>M. wenyonii</i> Cattle blood (Switzerland)          | 1.339 | 1.339 | 1.336 | 1.336 | 1.336 | 1.336 | 1.336 | 1.334 | 1.334 | 1.339 | 0.000 | 0.004 | 0.004 |       |       |       |    |
| 15  | FJ375309 <i>M. wenyonii</i> Cattle blood (China)                | 1.505 | 1.505 | 1.503 | 1.503 | 1.503 | 1.503 | 1.503 | 1.501 | 1.501 | 1.505 | 0.015 | 0.015 | 0.010 | 0.014 |       |       |    |
| 16  | MG948626 <i>M. wenyonii</i> Cattle blood (Cuba)                 | 1.373 | 1.373 | 1.370 | 1.370 | 1.370 | 1.370 | 1.370 | 1.368 | 1.368 | 1.373 | 0.004 | 0.004 | 0.000 | 0.004 | 0.010 |       |    |
| 17  | KY328836 <i>M. wenyonii</i> Buffalo blood (Brazil)              | 1.512 | 1.512 | 1.510 | 1.510 | 1.510 | 1.510 | 1.510 | 1.507 | 1.507 | 1.512 | 0.004 | 0.004 | 0.000 | 0.004 | 0.011 | 0.000 |    |

Pairwise distances calculations were accomplished using MEGA X software.

**Table S2.** Part of pairwise distance matrix based on nucleotide sequences of *Rickettsia* sp. strains.

| No. |                                                                          | 1     | 2     | 3     | 4     | 5     | 6     | 7     | 8     | 9     | 10    | 11    |
|-----|--------------------------------------------------------------------------|-------|-------|-------|-------|-------|-------|-------|-------|-------|-------|-------|
| 1   | <i>R. felis</i> Cte <i>felis felis</i> BVD20 (This study)                |       |       |       |       |       |       |       |       |       |       |       |
| 2   | <i>R. felis</i> Cte <i>felis felis</i> HND16 (This study)                | 0.000 |       |       |       |       |       |       |       |       |       |       |
| 3   | <i>R. felis</i> Cte <i>felis felis</i> BGD39 (This study)                | 0.000 | 0.000 |       |       |       |       |       |       |       |       |       |
| 4   | <i>R. felis</i> Cte <i>felis felis</i> VPD59 (This study)                | 0.000 | 0.000 | 0.000 |       |       |       |       |       |       |       |       |
| 5   | KY417891 <i>R. felis</i> Cte <i>felis felis</i> (Hongkong)               | 0.000 | 0.000 | 0.000 | 0.000 |       |       |       |       |       |       |       |
| 6   | KP318092 <i>R. felis</i> Homo sapiens (Bangladesh)                       | 0.000 | 0.000 | 0.000 | 0.000 | 0.000 |       |       |       |       |       |       |
| 7   | MT019628 <i>R. felis</i> Dog blood (China)                               | 0.000 | 0.000 | 0.000 | 0.000 | 0.000 | 0.000 |       |       |       |       |       |
| 8   | JN375498 <i>R. felis</i> Cte <i>felis felis</i> (Brazil)                 | 0.000 | 0.000 | 0.000 | 0.000 | 0.000 | 0.000 | 0.000 |       |       |       |       |
| 9   | KP749467 <i>R. felis</i> Cte <i>canis</i> (Czech Republic)               | 0.000 | 0.000 | 0.000 | 0.000 | 0.000 | 0.000 | 0.000 | 0.000 |       |       |       |
| 10  | JQ284386 <i>R. felis</i> Dog blood (Australia)                           | 0.000 | 0.000 | 0.000 | 0.000 | 0.000 | 0.000 | 0.000 | 0.000 | 0.000 |       |       |
| 11  | MH523408 <i>Rickettsia</i> sp. genotype RF2125 Cat blood (Thailand)      | 0.015 | 0.015 | 0.015 | 0.015 | 0.015 | 0.016 | 0.015 | 0.015 | 0.015 | 0.015 |       |
| 12  | MH523408 <i>Rickettsia</i> sp. genotype RF2125 Cte <i>canis</i> (France) | 0.015 | 0.015 | 0.015 | 0.015 | 0.015 | 0.016 | 0.015 | 0.015 | 0.015 | 0.015 | 0.000 |

Pairwise distances calculations were accomplished using MEGA X software.
